# Supplementary material for: Phase Shifting Capacity of the Circadian Pacemaker Determined by the SCN Neuronal Network Organization
Source: PubMed Central journal article supplement (PMC2655235; doi:10.1371/journal.pone.0004976), 2009-03-23

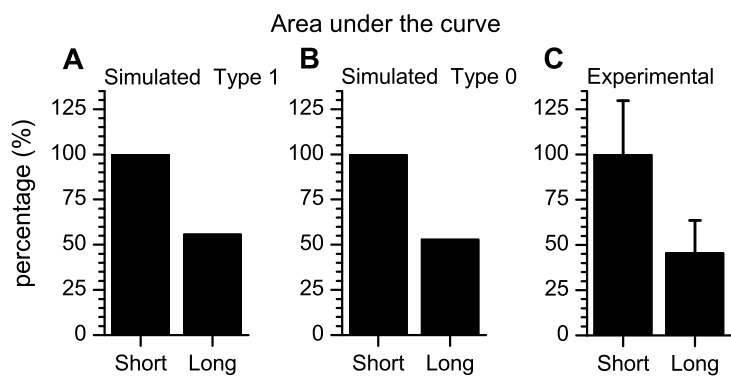

Supplement: pone.0004976.s003.pdf [file pone.0004976.s003.pdf]
